# Supplementary material for: LaFe1−xNixO3 perovskites in the catalytic reaction of high-temperature decomposition of nitrous oxide
Source: Royal Society of Chemistry journal article supplement (doi:10.1039/d4dt01897d), 2024-01-01

## Supplementary data

### S1. SEM + EDS data

The surface morphology of the samples was investigated using scanning electron microscopes JSM-6460 LV (Jeol, Tokyo, Japan) with a tungsten thermal cathode ( $E_0$ ) of 20 and 25 keV. The JSM-6460 LV microscope was equipped with an energy-dispersive X-ray spectrometer INCAx-sight (Oxford Instruments, Abindon, England), which made it possible to reveal the chemical composition of subsurface layers of the samples. The spectrometer was calibrated using the standards made of neat Si and Co. The quantitative analysis of the chemical composition of samples was performed on an INCA Energy-350 system (Oxford Instruments, Abindon, England) with the use of internal standards from the spectrometer database. Data were collected from 5 points in 3 different regions.

According to the data obtained, the samples are porous particles (agregates) of micron size (up to 100  $\mu\text{m}$ ). Within the measurement error of the EDX method, the cationic composition of the samples corresponds to the ratio laid down during synthesis. Detailed data are given below for the  $\text{LaFe}_{0.6}\text{Ni}_{0.4}\text{O}_3$  sample - micrographs with selected regions, for which atomic content of elements were obtained. Similar data were obtained for samples of  $\text{LaFe}_{0.8}\text{Ni}_{0.2}\text{O}_3$  and  $\text{LaFe}_{0.4}\text{Ni}_{0.6}\text{O}_3$ , for which only average data are given in the Table.

#### Sample $\text{LaFe}_{0.6}\text{Ni}_{0.4}\text{O}_3$

| Region 1 | O     | Fe    | Ni   | La    |
|----------|-------|-------|------|-------|
| Spectr 1 | 56.54 | 12.12 | 8.60 | 22.74 |
| Spectr 2 | 50.39 | 13.72 | 9.58 | 26.31 |
| Spectr 3 | 55.03 | 12.69 | 8.67 | 23.60 |
| Spectr 4 | 55.85 | 12.14 | 8.51 | 23.50 |
| Spectr 5 | 62.11 | 10.68 | 7.76 | 19.45 |
| Average  | 55.99 | 12.27 | 8.62 | 23.12 |

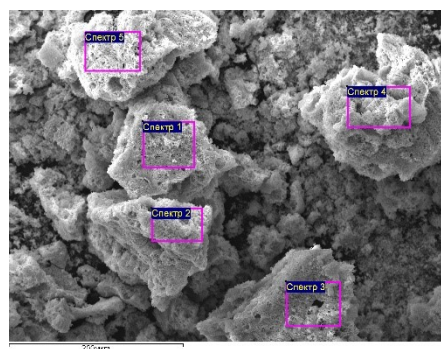

| Region 2 | O     | Fe    | Ni   | La    |
|----------|-------|-------|------|-------|
| Spectr 1 | 50.43 | 13.41 | 9.78 | 26.38 |
| Spectr 2 | 53.24 | 13.18 | 9.00 | 24.58 |
| Spectr 3 | 53.87 | 12.84 | 9.27 | 24.02 |
| Spectr 4 | 60.80 | 11.14 | 7.76 | 20.30 |
| Spectr 5 | 57.20 | 12.05 | 8.30 | 22.45 |
| Average  | 55.11 | 12.52 | 8.82 | 23.55 |

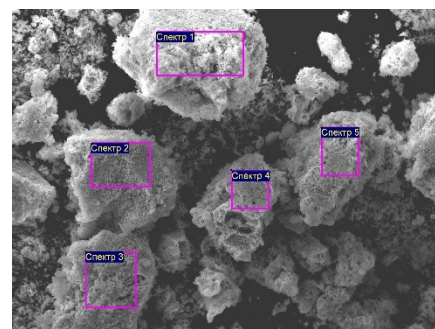

| Region 3 | O     | Fe    | Ni    | La    |
|----------|-------|-------|-------|-------|
| Spectr 1 | 57.61 | 11.84 | 8.37  | 22.18 |
| Spectr 2 | 46.57 | 14.46 | 10.49 | 28.48 |
| Spectr 3 | 58.86 | 11.60 | 7.84  | 21.70 |
| Спектр 4 | 48.70 | 13.95 | 10.20 | 27.14 |
| Spectr 5 | 52.31 | 13.08 | 9.67  | 24.94 |
| Average  | 52.81 | 12.99 | 9.31  | 24.89 |

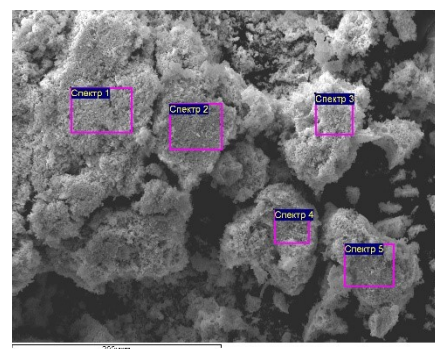

Table. EDX data on average atomic content in the samples

| Sample                                               | Average atomic content |      |      |      |       |
|------------------------------------------------------|------------------------|------|------|------|-------|
|                                                      | O                      | Fe   | Ni   | La   | Fe/Ni |
| LaFe <sub>0.8</sub> Ni <sub>0.2</sub> O <sub>3</sub> | 56.2                   | 16.2 | 4.5  | 22.5 | 3.6   |
| LaFe <sub>0.6</sub> Ni <sub>0.4</sub> O <sub>3</sub> | 54.6                   | 12.6 | 8.9  | 23.9 | 1.4   |
| LaFe <sub>0.4</sub> Ni <sub>0.6</sub> O <sub>3</sub> | 57.0                   | 7.8  | 12.4 | 22.8 | 0.6   |

S2. Volume of unit cell versus Ni content in  $\text{LaFe}_{1-x}\text{Ni}_x\text{O}_3$  perovskites

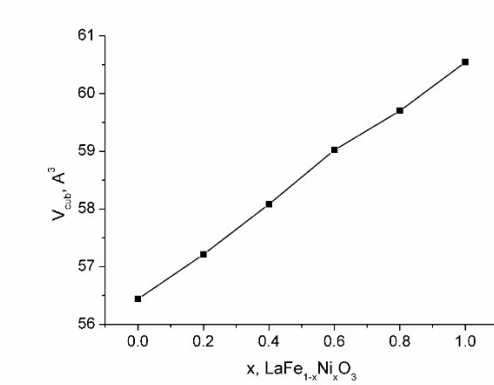

S3. TEM data for  $\text{LaFe}_{0.2}\text{Ni}_{0.8}\text{O}_3$

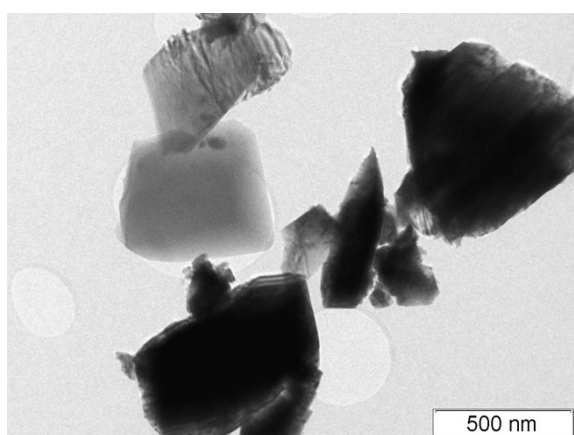

Supplement: d4dt01897d1.pdf [file d4dt01897d1.pdf]
